# Supplementary material for: Two Novel Alkaliphilic Species Isolated from Saline-Alkali Soil in China: Halalkalibacter flavus sp. nov., and Halalkalibacter lacteus sp. nov
Source: MDPI journal article supplement (doi:10.3390/microorganisms12050950), 2024-05-08

## Supplementary materials

**Two novel alkaliphilic species isolated from saline-alkali soil in China: *Halalkalibacter flavus* sp. nov. and *Halalkalibacter lacteus* sp. nov**

**Pin-Jiao Jin<sup>1</sup>, Lei Sun<sup>1</sup>, Yong-Hong Liu<sup>2</sup>, Kang-Kang Wang<sup>1</sup>, Manik Prabhu Narsing Rao<sup>5</sup>, Osama Abdalla Abdelshafy Mohamad<sup>2</sup>, Bao-Zhu Fang<sup>2,3</sup>, Li Li<sup>2</sup>, Lei Gao<sup>2</sup>, Wen-Jun Li<sup>2,4</sup>, Shuang Wang<sup>1,2,\*</sup>**

<sup>1</sup>Heilongjiang Academy of Black Soil Conservation & Utilization, Postdoctoral Station of Heilongjiang Academy of Agricultural Sciences, Harbin 150086, PR China

<sup>2</sup>State Key Laboratory of Desert and Oasis Ecology, Key Laboratory of Ecological Safety and Sustainable Development in Arid Lands, Xinjiang Institute of Ecology and Geography, Chinese Academy of Sciences, Urumqi, 830011, PR China

<sup>3</sup>Xinjiang Key Laboratory of Biodiversity Conservation and Application in Arid Lands, Xinjiang Institute of Ecology and Geography, Chinese Academy of Sciences, Urumqi, 830011, PR China

<sup>4</sup>State Key Laboratory of Biocontrol and Guangdong Key Laboratory of Plant Resources, School of Life Sciences, Sun Yat-Sen University, Guangzhou 510275, PR China

<sup>5</sup>Instituto de Ciencias Aplicadas, Facultad de Ingeniería, Universidad Autónoma de Chile, Sede Talca, Talca 3460000, Chile

### **\*Authors for correspondence:**

Shuang Wang, Heilongjiang Academy of Black Soil Conservation & Utilization, 368 Xuefu Road, Harbin 150086, PR China, Tel & Fax: +86 0451-86668726, E-mail: wangshuang0726@163.com

Running title: *Halalkalibacter flavus* sp. nov., and *Halalkalibacter lacteus* sp. nov.

**Table S1.** Number of genes associated with metabolism of strains HR1-10<sup>T</sup>, J-A-003<sup>T</sup> and other closest relatives. Taxa: 1. strain HR1-10<sup>T</sup>; 2. strain J-A-003<sup>T</sup>; 3. *H. wakoensis* JCM 9140<sup>T</sup>; 4. *H. okhensis* JCM 10340<sup>T</sup>; 5. *H. kiskunsagensis* DSM 29791<sup>T</sup>.

| Metabolism                                  | 1   | 2   | 3   | 4   | 5   |
|---------------------------------------------|-----|-----|-----|-----|-----|
| Amino acid metabolism                       | 380 | 302 | 399 | 350 | 325 |
| Biosynthesis of other secondary metabolites | 41  | 33  | 36  | 31  | 36  |
| Carbohydrate metabolism                     | 557 | 449 | 453 | 489 | 337 |
| Cell growth and death                       | 13  | 17  | 16  | 13  | 30  |
| Cell motility                               | 34  | 19  | 97  | 81  | 40  |
| Energy metabolism                           | 182 | 177 | 172 | 163 | 182 |
| Folding, sorting and degradation            | 56  | 55  | 56  | 50  | 42  |
| Glycan biosynthesis and metabolism          | 33  | 32  | 32  | 32  | 32  |
| Lipid metabolism                            | 107 | 80  | 130 | 102 | 82  |
| Membrane transport                          | 215 | 157 | 130 | 165 | 186 |
| Metabolism of cofactors and vitamins        | 176 | 172 | 162 | 155 | 144 |
| Metabolism of other amino acids             | 74  | 65  | 62  | 64  | 80  |
| Metabolism of terpenoids and polyketides    | 38  | 33  | 52  | 33  | 43  |
| Nucleotide metabolism                       | 120 | 133 | 136 | 126 | 112 |
| Overview                                    | 364 | 336 | 375 | 355 | 314 |
| Replication and repair                      | 83  | 96  | 103 | 89  | 65  |
| Signal transduction                         | 125 | 95  | 144 | 133 | 90  |
| Transcription                               | 5   | 5   | 6   | 5   | 4   |
| Translation                                 | 90  | 89  | 100 | 90  | 74  |
| Transport and catabolism                    | 11  | 11  | 12  | 14  | 11  |
| Xenobiotics biodegradation and metabolism   | 86  | 45  | 111 | 79  | 129 |

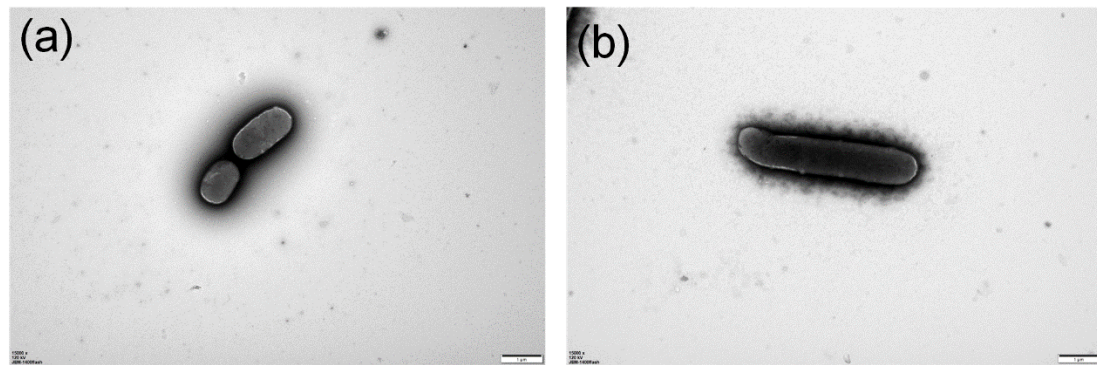

**Figure S1.** Transmission electronic micrograph of strains: a) HR1-10<sup>T</sup> and b) J-A-003<sup>T</sup> grown on APA agar at 37 °C for 3 days. Bars, 1 μm.

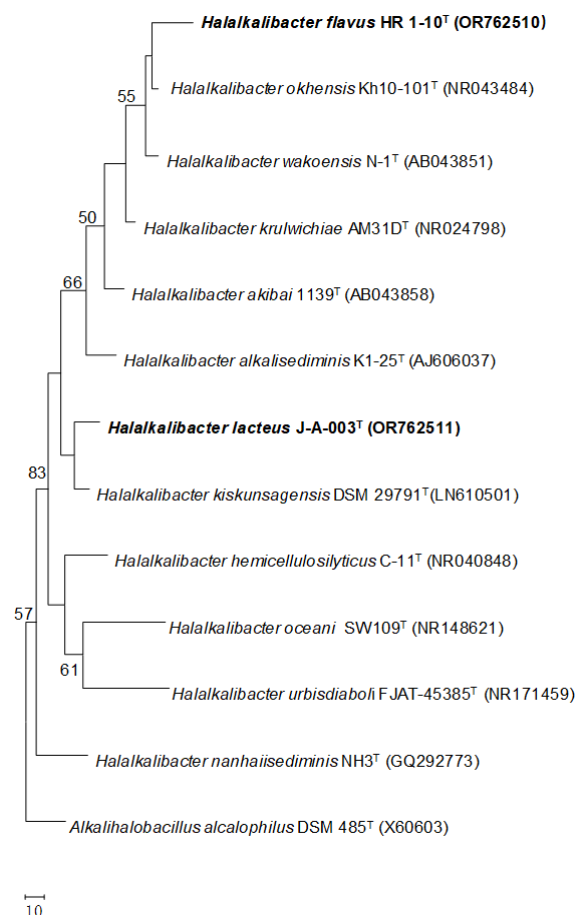

**Figure S2** Maximum-parsimony phylogenetic tree based on 16S rRNA gene sequences of HR1-10<sup>T</sup>, J-A-003<sup>T</sup> and other closest relatives. Bootstrap values (≥50 %) based on 1000 replications are shown at branch nodes. *Alkalihalobacillus alcalophilus* DSM 485<sup>T</sup> (X60603) is used as the outgroup. Bar, 10 represents substitutions per nucleotide position.

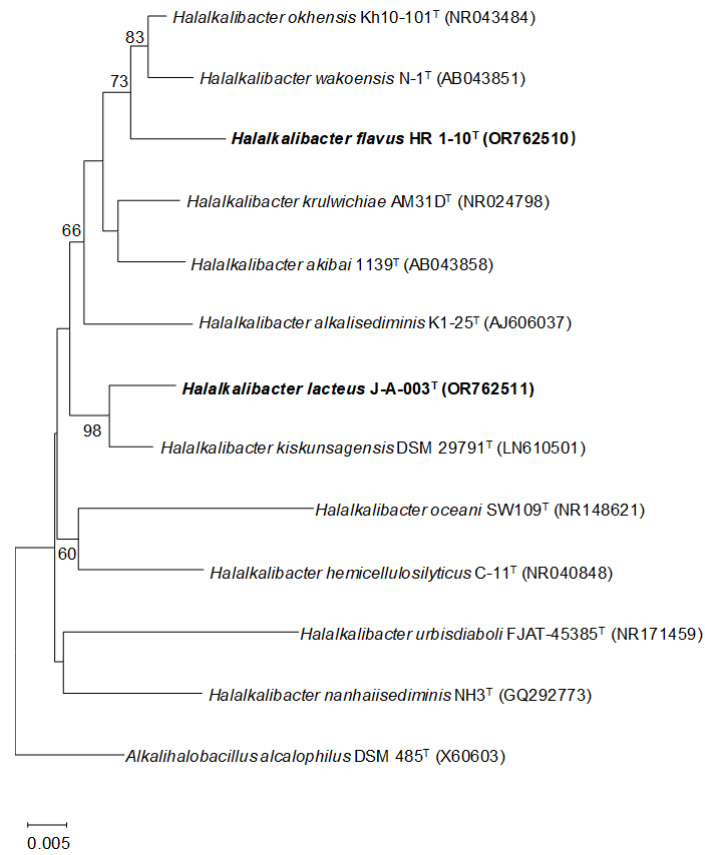

**Figure S3.** Neighbor-joining phylogenetic tree based on 16S rRNA gene sequences of strains HR1-10<sup>T</sup>, J-A-003<sup>T</sup> and other closest relatives. Bootstrap values (≥50%) based on 1000 replications are shown at branch nodes. *Alkalihalobacillus alcalophilus* DSM 485<sup>T</sup> (X60603) is used as the outgroup. Bar, 0.005 represents substitutions per nucleotide position.

**Figure S4** Two-dimensional TLC patterns of the total polar lipids from strains (a), HR1-10<sup>T</sup> and (b) J-A-003<sup>T</sup>, the plates were developed using chloroform/methanol/water (65:25:4 v/v) as the first direction, followed by chloroform/acetic acid/methanol/water (80:15:12:4 v/v) as the second direction.

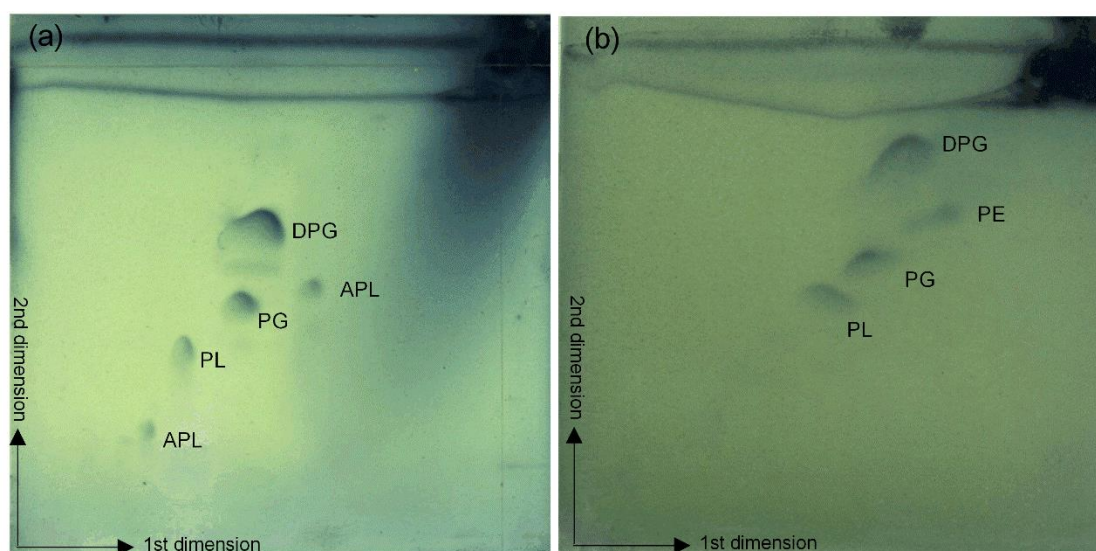

Abbreviations: DPG, diphosphatidylglycerol; PG, phosphatidylglycerol; APL, unidentified aminophospholipids; PL, unidentified phospholipid; PE, Phosphatidylethanolamine.

**Figure S5** Functional annotation using RAST for strains HR1-10<sup>T</sup> (a) and J-A-003<sup>T</sup> (b).

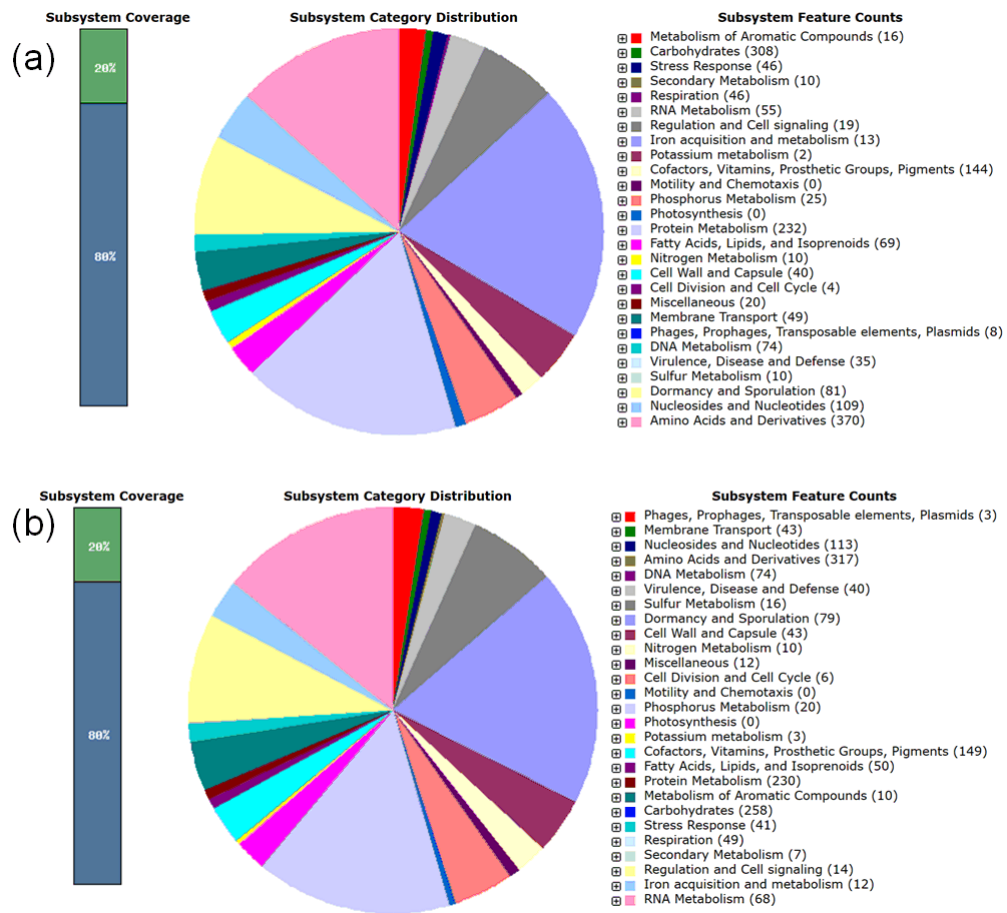

**Figure S6** Evaluation of plant growth promotion.

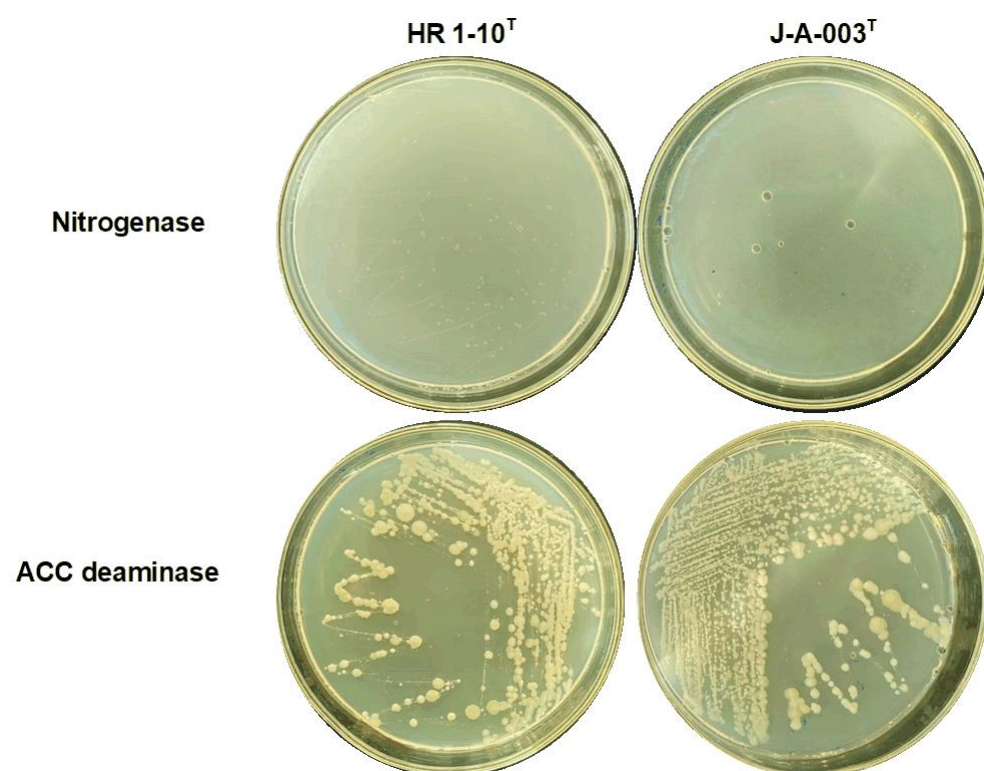

Supplement: s1 [file s1]
